# Supplementary material for: Characterization of phosphorus-regulated miR399 and miR827 and their isomirs in barley under phosphorus-sufficient and phosphorus-deficient conditions
Source: PubMed Central journal article supplement (PMC3878733; doi:10.1186/1471-2229-13-214), 2013-12-13
Supplement: 1471-2229-13-214-S3.pdf [file 1471-2229-13-214-S3.pdf]

miR399-1

miR399-2

miR399-3

miR399-4

miR399b

miR399e-1

miR399e-2

miR399c

miR399d  
(Barke)

miR399d  
(Morex)

miR399k

hvu-MIR827

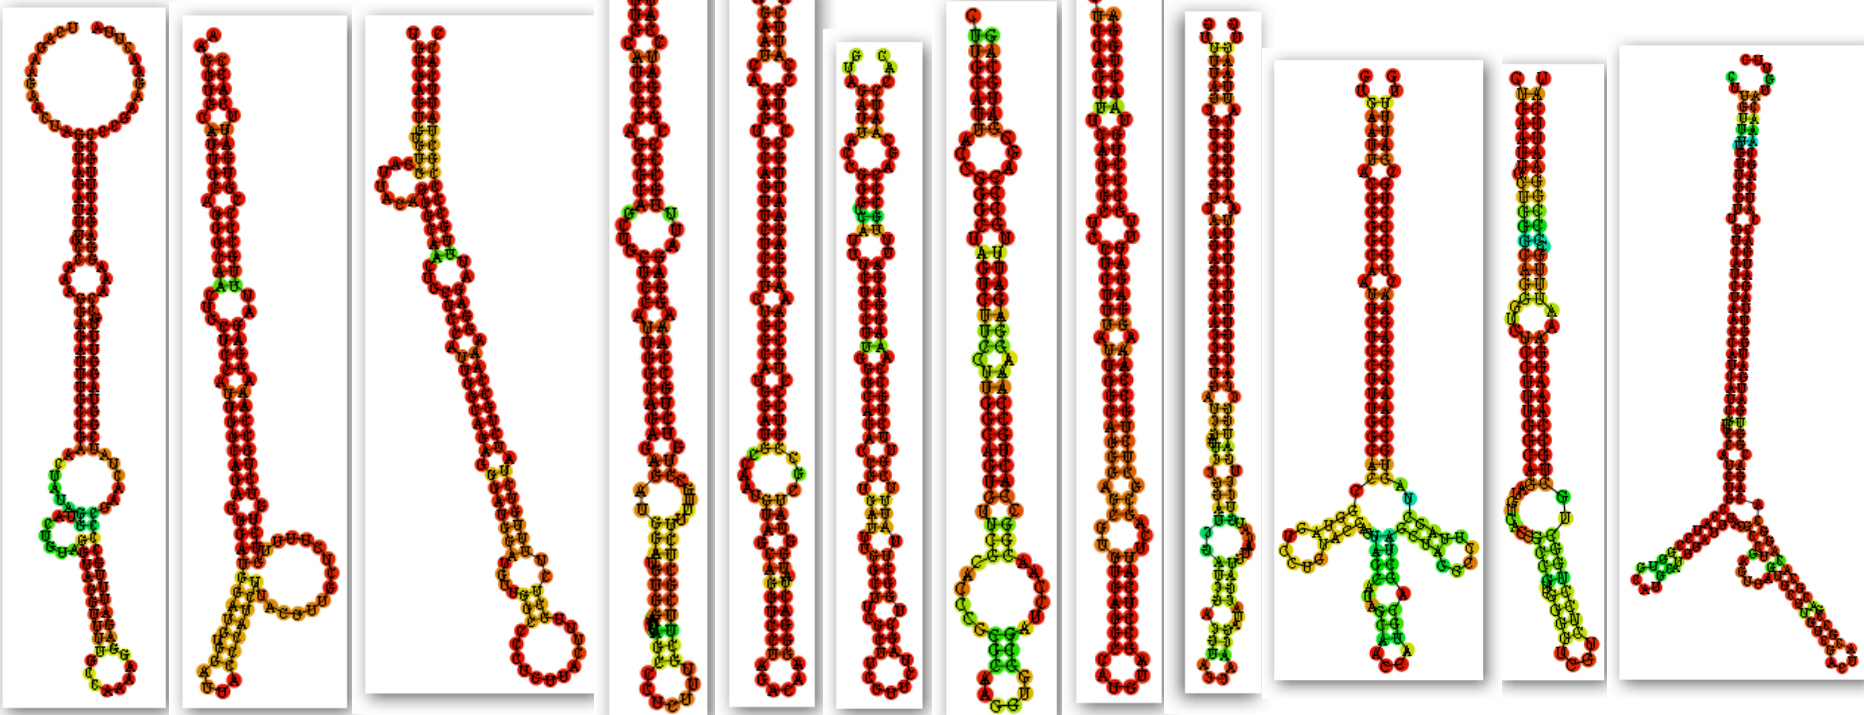

Supplemental Figure 1

hvu-MIR399-1

| P sufficient                                                                                                                   | read count                |
|--------------------------------------------------------------------------------------------------------------------------------|---------------------------|
| TCAGAAGAAGCTAGGTAGATTGCCAAAGGAGATTGCCGAAGTATAGGTACTGTAGGTAGGTTTGGCCAAAAGGAGATTGCCCGAAGTATCGGTAGGTTTGCCAAAGGAGATTGCCCGAAGAACTTA | 6                         |
| .....(((((((.....((((((((((((.....((((((((((((.....))))))))))))))))))))))))))))))))))))))))))))))))))))))))))))))))))))))))))  |                           |
|                                                                                                                                | TGCCAAAGGAGATTGCCCG 4     |
|                                                                                                                                | TGCCAAAGGAGATTGCCCG 1     |
| GGAGATTGCCGAAGTATAGGT                                                                                                          | 1                         |
|                                                                                                                                |                           |
| P deficient                                                                                                                    | 168 (total count)         |
| TCAGAAGAAGCTAGGTAGATTGCCAAAGGAGATTGCCGAAGTATAGGTACTGTAGGTAGGTTTGGCCAAAAGGAGATTGCCCGAAGTATCGGTAGGTTTGCCAAAGGAGATTGCCCGAAGAACTTA |                           |
| .....(((((((.....((((((((((((.....((((((((((((.....))))))))))))))))))))))))))))))))))))))))))))))))))))))))))))))))))))))))))  |                           |
|                                                                                                                                | TGCCAAAGGAGATTGCCCG 123   |
|                                                                                                                                | AAGGAGATTGCCCG 4          |
|                                                                                                                                | TGCCAAAGGAGATTGCC 4       |
| TGCCAAAGGAGATTGCC                                                                                                              | 4                         |
|                                                                                                                                | AAGGAGATTGCCCG 4          |
|                                                                                                                                | TGCCAAAGGAGATTGCC 4       |
| TATAGGTACTGTAGGTAGGTT                                                                                                          | 3                         |
| ACTATAGGTACTGTAGGTAGGTT                                                                                                        | 3                         |
|                                                                                                                                | TGCCAAAGGAGATTGCC 2       |
|                                                                                                                                | TGCCAAAGGAGATTGCC 2       |
| TGCCAAAGGAGATTGCC                                                                                                              | 2                         |
| AGAAGAAGCTAGGTAGATTGC                                                                                                          | 2                         |
| TCAGAAGAAGCTAGGTAGATTGC                                                                                                        | 2                         |
| TGCCAAAGGAGATTGCCAA                                                                                                            | 2                         |
|                                                                                                                                | TGCCAAAGGAGATTGCCCGAA 1   |
|                                                                                                                                | TGCCAAAGGAGATTGCCCGA 1    |
|                                                                                                                                | TGCCAAAGGAGATTGCCCG 1     |
|                                                                                                                                | GCCAAAGGAGATTGCCCG 1      |
|                                                                                                                                | TGCCAAAGGAGATTGCCCG 1     |
|                                                                                                                                | TGCCAAAGGAGATTGCCCG 1     |
|                                                                                                                                | TGCCAAAGGAGATTGCCCG 1     |
|                                                                                                                                | TGCCAAAGGAGATTGCCCG 1     |
|                                                                                                                                | TGCCAAAGGAGATTGCCCG 1     |
|                                                                                                                                | AGGAGATTGCCCGAAGTAT 1     |
|                                                                                                                                | GTACTGTAGGTAGGTTTGGCCAA 1 |
|                                                                                                                                | GTACTGTAGGTAGGTTTGGCAA 1  |
|                                                                                                                                | GTACTGTAGGTAGGTTTGGCC 1   |
| AACTATAGGTACTGTAGGTAGG                                                                                                         | 1                         |

Supplemental Figure 2

# miR827

Read count

```

                    TTTTGTGGTTGTCATCTAACC                                (169)
5'
--- T          T          T          TT  A  -
  C TGTTT GTTGGT GTCATCTAACCATCATCG  CC TCTG
  | ||||| ||||| ||||| ||||| ||||| ||||| ||||| ||||| ||||| ||||| ||||| |||||
  G ACAA CGACTA CAGTAGATTGGTAGTAGT  GG AGAC
CTT T          -          C          --  C  A
3'
                    ACAA-CGACTACCAGTAGATT                                (8935)

```

# miR827 (alt)

```

                    TTGTCATCTAACCATCATCG                                (2)
5'
--- T          T          T          TT  A  -
  C TGTTT GTTGGT GTCATCTAACCATCATCG  CC TCTG
  | ||||| ||||| ||||| ||||| ||||| ||||| ||||| ||||| ||||| ||||| ||||| |||||
  G ACAA CGACTA CAGTAGATTGGTAGTAGT  GG AGAC
CTT T          -          C          --  C  A
3'
                    CTACCAGTAGATTGGTAGTA                                (10)

```
